# Supplementary material for: Machine learning-based prediction of toxicity of organic compounds towards fathead minnow
Source: Royal Society of Chemistry journal article supplement (doi:10.1039/d0ra05906d), 2020-01-01
Supplement: d0ra05906d1.pdf [file d0ra05906d1.pdf]

**Supplemental file**

**Quantitative structure–toxicity relationships of organic  
compounds towards fathead minnow**

Chen Xingmei, Limin Dang\*, Hai Yang, Xianwei Huang\*, and Xinliang Yu\*

Hunan Provincial Key Laboratory of Environmental Catalysis & Waste Regeneration,  
College of Materials and Chemical Engineering, Hunan Institute of Engineering, Xiangtan,  
Hunan 411104, China

\*Corresponding author:

Limin Dang: Tel. +86 0731-58680049; Fax: +86 0731-58680125; E-mail:

l3055155812@163.com; ORCID: 0000-0001-7625-1410

Xianwei Huang: Tel. +86 0731-58680049; Fax: +86 0731-58680125; E-mail:

hxw1o3o@126.com; ORCID: 0000-0002-5346-5579

Xinliang Yu: Tel. +86 731 58680049; Fax: +86 731 58680125; E-mail: yxl@hnie.edu.cn;

ORCID: 0000-0002-0952-3567; Present/permanent address: Donghu Road 18#, Xiangtan,

Hunan 411104, China

**Table S1**

Experimental and prediction toxicities of 963 compounds.

| No.          | CAS      | pLC <sub>50</sub> /mol L <sup>-1</sup> (exp.) | pLC <sub>50</sub> /mol L <sup>-1</sup> (SVM) |
|--------------|----------|-----------------------------------------------|----------------------------------------------|
| Training set |          |                                               |                                              |
| 1            | 104881   | 4.81                                          | 3.82                                         |
| 2            | 2385855  | 6.74                                          | 6.75                                         |
| 3            | 2691410  | 4.3                                           | 4.31                                         |
| 4            | 28553120 | 6.47                                          | 6.46                                         |
| 5            | 309002   | 7.65                                          | 7.75                                         |
| 6            | 1071836  | 3.4                                           | 3.39                                         |
| 7            | 67561    | 0.04                                          | 0.05                                         |
| 8            | 82713    | 5.91                                          | 5.90                                         |
| 9            | 33820530 | 6                                             | 6.49                                         |
| 10           | 78342    | 4.69                                          | 4.70                                         |
| 11           | 104405   | 6.2                                           | 6.57                                         |
| 12           | 76017    | 4.43                                          | 4.73                                         |
| 13           | 7209383  | 1.81                                          | 1.60                                         |
| 14           | 6284839  | 6.09                                          | 6.75                                         |
| 15           | 4151502  | 6.45                                          | 6.44                                         |
| 16           | 32534955 | 4.24                                          | 5.80                                         |
| 17           | 52686    | 4.51                                          | 4.50                                         |
| 18           | 110167   | 4.37                                          | 3.68                                         |
| 19           | 143500   | 6.07                                          | 6.08                                         |
| 20           | 55389    | 4.96                                          | 4.79                                         |
| 21           | 3347226  | 6.25                                          | 6.15                                         |
| 22           | 75092    | 2.41                                          | 2.65                                         |
| 23           | 3380345  | 6.05                                          | 6.04                                         |
| 24           | 3206313  | 4.24                                          | 4.22                                         |

| No. | CAS      | pLC <sub>50</sub> /mol L <sup>-1</sup> (exp.) | pLC <sub>50</sub> /mol L <sup>-1</sup> (SVM) |
|-----|----------|-----------------------------------------------|----------------------------------------------|
| 25  | 693210   | 2.6                                           | 2.61                                         |
| 26  | 16672870 | 3.05                                          | 3.86                                         |
| 27  | 110543   | 4.54                                          | 4.53                                         |
| 28  | 22431625 | 8.57                                          | 8.58                                         |
| 29  | 1770805  | 6.7                                           | 6.69                                         |
| 30  | 786196   | 6.16                                          | 6.11                                         |
| 31  | 84695    | 5.49                                          | 5.23                                         |
| 32  | 596850   | 6.38                                          | 5.73                                         |
| 33  | 920661   | 2.84                                          | 2.59                                         |
| 34  | 133073   | 6                                             | 5.68                                         |
| 35  | 121824   | 4.31                                          | 4.32                                         |
| 36  | 132649   | 5.05                                          | 5.21                                         |
| 37  | 12789036 | 6.9                                           | 6.91                                         |
| 38  | 2104645  | 6.59                                          | 5.67                                         |
| 39  | 2034222  | 4.7                                           | 4.12                                         |
| 40  | 999973   | 2.99                                          | 3.29                                         |
| 41  | 107153   | 3.44                                          | 1.65                                         |
| 42  | 13411160 | 5.48                                          | 4.48                                         |
| 43  | 115297   | 8.47                                          | 7.38                                         |
| 44  | 60297    | 1.46                                          | 1.85                                         |
| 45  | 66762    | 4.82                                          | 5.47                                         |
| 46  | 60004    | 3.69                                          | 3.70                                         |
| 47  | 1445756  | 2.45                                          | 2.65                                         |
| 48  | 107222   | 2.33                                          | 3.04                                         |
| 49  | 34364426 | 6.65                                          | 6.66                                         |
| 50  | 17109363 | 7.69                                          | 7.67                                         |
| 51  | 70304    | 7.29                                          | 6.74                                         |
| 52  | 629196   | 4.76                                          | 4.75                                         |

| No. | CAS      | pLC <sub>50</sub> /mol L <sup>-1</sup> (exp.) | pLC <sub>50</sub> /mol L <sup>-1</sup> (SVM) |
|-----|----------|-----------------------------------------------|----------------------------------------------|
| 53  | 137268   | 5.95                                          | 4.84                                         |
| 54  | 77736    | 3.41                                          | 4.38                                         |
| 55  | 79118    | 2.81                                          | 2.76                                         |
| 56  | 121573   | 3.24                                          | 3.23                                         |
| 57  | 50000    | 3.1                                           | 3.11                                         |
| 58  | 107493   | 6.08                                          | 4.26                                         |
| 59  | 513815   | 4.08                                          | 4.65                                         |
| 60  | 6948863  | 2.62                                          | 2.77                                         |
| 61  | 86500    | 6.7                                           | 4.91                                         |
| 62  | 95636    | 4.19                                          | 4.14                                         |
| 63  | 5598130  | 5.68                                          | 5.87                                         |
| 64  | 618622   | 4.63                                          | 4.58                                         |
| 65  | 57067    | 6.06                                          | 4.96                                         |
| 66  | 145733   | 5.39                                          | 3.56                                         |
| 67  | 618871   | 3.93                                          | 4.08                                         |
| 68  | 100016   | 3.04                                          | 3.30                                         |
| 69  | 19398131 | 5.57                                          | 5.74                                         |
| 70  | 1241947  | 5.98                                          | 6.01                                         |
| 71  | 87729    | 0.6                                           | 2.39                                         |
| 72  | 2357473  | 3.78                                          | 3.84                                         |
| 73  | 608719   | 6.72                                          | 6.31                                         |
| 74  | 78513    | 4.55                                          | 4.56                                         |
| 75  | 79947    | 6                                             | 6.43                                         |
| 76  | 7700176  | 4.42                                          | 4.52                                         |
| 77  | 112801   | 3.14                                          | 6.66                                         |
| 78  | 40596698 | 7.49                                          | 5.70                                         |
| 79  | 6491027  | 6.08                                          | 6.09                                         |
| 80  | 300765   | 5.06                                          | 5.47                                         |

| No. | CAS      | pLC <sub>50</sub> /mol L <sup>-1</sup> (exp.) | pLC <sub>50</sub> /mol L <sup>-1</sup> (SVM) |
|-----|----------|-----------------------------------------------|----------------------------------------------|
| 81  | 107051   | 3.54                                          | 3.67                                         |
| 82  | 791286   | 3.72                                          | 3.91                                         |
| 83  | 563122   | 5.73                                          | 5.74                                         |
| 84  | 52645531 | 7.39                                          | 7.40                                         |
| 85  | 1689834  | 4.74                                          | 4.75                                         |
| 86  | 287923   | 3.41                                          | 3.42                                         |
| 87  | 7785708  | 5.69                                          | 5.35                                         |
| 88  | 3252435  | 5.56                                          | 3.44                                         |
| 89  | 19902046 | 6.35                                          | 6.36                                         |
| 90  | 66441234 | 4.71                                          | 6.26                                         |
| 91  | 87912    | 2.5                                           | 2.51                                         |
| 92  | 117817   | 5.59                                          | 5.64                                         |
| 93  | 75218    | 2.72                                          | 1.70                                         |
| 94  | 22367766 | 3.13                                          | 3.12                                         |
| 95  | 2310170  | 6.06                                          | 6.07                                         |
| 96  | 2495376  | 4.58                                          | 4.16                                         |
| 97  | 2894511  | 5.04                                          | 5.03                                         |
| 98  | 111159   | 3.5                                           | 2.65                                         |
| 99  | 3481207  | 5.93                                          | 5.30                                         |
| 100 | 584792   | 6.58                                          | 6.12                                         |
| 101 | 30560191 | 5.26                                          | 3.83                                         |
| 102 | 23135220 | 4.51                                          | 3.79                                         |
| 103 | 2809214  | 1.98                                          | 3.83                                         |
| 104 | 67663    | 3.23                                          | 3.14                                         |
| 105 | 5331919  | 4.8                                           | 4.93                                         |
| 106 | 60571    | 7.33                                          | 6.81                                         |
| 107 | 868859   | 2.69                                          | 3.12                                         |
| 108 | 101553   | 5.64                                          | 5.87                                         |

| No. | CAS      | pLC <sub>50</sub> /mol L <sup>-1</sup> (exp.) | pLC <sub>50</sub> /mol L <sup>-1</sup> (SVM) |
|-----|----------|-----------------------------------------------|----------------------------------------------|
| 109 | 33878501 | 5.9                                           | 5.84                                         |
| 110 | 75354    | 2.86                                          | 3.55                                         |
| 111 | 84628    | 6.6                                           | 6.18                                         |
| 112 | 67721    | 5.22                                          | 5.45                                         |
| 113 | 127184   | 4                                             | 4.54                                         |
| 114 | 111477   | 3.74                                          | 3.92                                         |
| 115 | 111966   | 1.2                                           | 1.19                                         |
| 116 | 107028   | 6.52                                          | 3.78                                         |
| 117 | 26896184 | 4.39                                          | 4.40                                         |
| 118 | 74908    | 5.3                                           | 3.53                                         |
| 119 | 15673004 | 2.23                                          | 2.88                                         |
| 120 | 111831   | 5.36                                          | 5.21                                         |
| 121 | 57055397 | 5.76                                          | 6.20                                         |
| 122 | 2245387  | 4.42                                          | 5.35                                         |
| 123 | 39515418 | 8.17                                          | 7.10                                         |
| 124 | 14064109 | 5.31                                          | 3.66                                         |
| 125 | 3179906  | 3.84                                          | 4.84                                         |
| 126 | 16752775 | 4.89                                          | 3.64                                         |
| 127 | 68122    | 0.84                                          | 1.75                                         |
| 128 | 2475469  | 5.47                                          | 4.85                                         |
| 129 | 79776    | 4.58                                          | 4.76                                         |
| 130 | 385002   | 3.36                                          | 3.53                                         |
| 131 | 90471    | 4.73                                          | 4.37                                         |
| 132 | 76039    | 1.91                                          | 3.48                                         |
| 133 | 79345    | 3.92                                          | 3.86                                         |
| 134 | 1929733  | 5                                             | 5.18                                         |
| 135 | 77474    | 7.59                                          | 6.42                                         |
| 136 | 2008584  | 2.61                                          | 3.27                                         |

| No. | CAS      | pLC <sub>50</sub> /mol L <sup>-1</sup> (exp.) | pLC <sub>50</sub> /mol L <sup>-1</sup> (SVM) |
|-----|----------|-----------------------------------------------|----------------------------------------------|
| 137 | 59756604 | 7.18                                          | 4.53                                         |
| 138 | 3687136  | 4.74                                          | 4.70                                         |
| 139 | 1757182  | 6.14                                          | 6.29                                         |
| 140 | 6639301  | 5.42                                          | 5.21                                         |
| 141 | 103059   | 3.39                                          | 3.56                                         |
| 142 | 1080326  | 2.83                                          | 3.04                                         |
| 143 | 616728   | 4.39                                          | 4.40                                         |
| 144 | 2232088  | 3.73                                          | 4.16                                         |
| 145 | 115195   | 1.41                                          | 2.64                                         |
| 146 | 51285    | 4.29                                          | 4.06                                         |
| 147 | 13171216 | 3.48                                          | 4.87                                         |
| 148 | 4214793  | 2.06                                          | 3.42                                         |
| 149 | 872504   | 1.97                                          | 2.52                                         |
| 150 | 761659   | 3.25                                          | 3.64                                         |
| 151 | 5217470  | 1.65                                          | 3.97                                         |
| 152 | 3309680  | 5.93                                          | 5.49                                         |
| 153 | 106898   | 3.86                                          | 2.57                                         |
| 154 | 882337   | 6.3                                           | 5.38                                         |
| 155 | 13909734 | 3.02                                          | 2.89                                         |
| 156 | 1647161  | 5.68                                          | 5.60                                         |
| 157 | 102716   | 1.1                                           | 2.31                                         |
| 158 | 133062   | 6.18                                          | 6.17                                         |
| 159 | 88963397 | 4.73                                          | 4.63                                         |
| 160 | 106945   | 3.26                                          | 3.40                                         |
| 161 | 5395755  | 3.4                                           | 3.99                                         |
| 162 | 683727   | 2.73                                          | 2.95                                         |
| 163 | 330541   | 4.22                                          | 4.05                                         |
| 164 | 21725462 | 4.12                                          | 3.03                                         |

| No. | CAS      | pLC <sub>50</sub> /mol L <sup>-1</sup> (exp.) | pLC <sub>50</sub> /mol L <sup>-1</sup> (SVM) |
|-----|----------|-----------------------------------------------|----------------------------------------------|
| 165 | 70382    | 6.66                                          | 6.46                                         |
| 166 | 42454068 | 3.6                                           | 3.83                                         |
| 167 | 5835267  | 5.54                                          | 6.52                                         |
| 168 | 69770236 | 5.84                                          | 6.37                                         |
| 169 | 108941   | 2.2                                           | 2.87                                         |
| 170 | 955839   | 6.64                                          | 6.63                                         |
| 171 | 732116   | 4.64                                          | 5.76                                         |
| 172 | 123386   | 2.65                                          | 2.95                                         |
| 173 | 143168   | 5.38                                          | 5.39                                         |
| 174 | 79124768 | 5.95                                          | 5.86                                         |
| 175 | 13209159 | 5.99                                          | 5.71                                         |
| 176 | 26530201 | 6.18                                          | 4.76                                         |
| 177 | 118741   | 6.38                                          | 6.37                                         |
| 178 | 107073   | 3.18                                          | 2.37                                         |
| 179 | 106514   | 6.38                                          | 4.54                                         |
| 180 | 764136   | 4.47                                          | 4.68                                         |
| 181 | 29232937 | 5.09                                          | 4.26                                         |
| 182 | 314409   | 3.15                                          | 4.45                                         |
| 183 | 327980   | 6.17                                          | 6.25                                         |
| 184 | 58082    | 3.11                                          | 2.77                                         |
| 185 | 28689089 | 6.72                                          | 5.86                                         |
| 186 | 98828    | 4.28                                          | 4.45                                         |
| 187 | 35367385 | 5.86                                          | 5.54                                         |
| 188 | 55630    | 4.92                                          | 3.58                                         |
| 189 | 626437   | 4.2                                           | 4.01                                         |
| 190 | 141979   | 2.64                                          | 3.03                                         |
| 191 | 57147    | 3.88                                          | 0.59                                         |
| 192 | 756809   | 3.83                                          | 4.07                                         |



| No. | CAS      | pLC <sub>50</sub> /mol L <sup>-1</sup> (exp.) | pLC <sub>50</sub> /mol L <sup>-1</sup> (SVM) |
|-----|----------|-----------------------------------------------|----------------------------------------------|
| 193 | 51630581 | 7.92                                          | 6.85                                         |
| 194 | 61788327 | 5.67                                          | 7.06                                         |
| 195 | 609234   | 5.59                                          | 5.91                                         |
| 196 | 4655349  | 3.53                                          | 3.54                                         |
| 197 | 142961   | 3.61                                          | 3.80                                         |
| 198 | 50293    | 7.46                                          | 6.38                                         |
| 199 | 98033    | 3.46                                          | 3.55                                         |
| 200 | 96093    | 4.05                                          | 3.28                                         |
| 201 | 2032599  | 5.03                                          | 3.52                                         |
| 202 | 90131    | 4.85                                          | 4.85                                         |
| 203 | 80546    | 4.61                                          | 5.01                                         |
| 204 | 121733   | 3.92                                          | 3.99                                         |
| 205 | 7212444  | 5.19                                          | 5.37                                         |
| 206 | 109875   | 1.04                                          | 1.06                                         |
| 207 | 76448    | 7.21                                          | 7.52                                         |
| 208 | 79016    | 3.47                                          | 4.11                                         |
| 209 | 1689823  | 5.23                                          | 5.32                                         |
| 210 | 619807   | 3.1                                           | 3.44                                         |
| 211 | 78875    | 2.95                                          | 3.19                                         |
| 212 | 608731   | 6.37                                          | 5.79                                         |
| 213 | 631641   | 3.5                                           | 3.24                                         |
| 214 | 101202   | 6.54                                          | 6.37                                         |
| 215 | 17804352 | 5.12                                          | 3.93                                         |
| 216 | 126738   | 4.45                                          | 4.61                                         |
| 217 | 58138082 | 5.39                                          | 6.10                                         |
| 218 | 96139    | 3.49                                          | 3.24                                         |
| 219 | 96489713 | 8.2                                           | 6.57                                         |
| 220 | 78273    | 2.69                                          | 2.46                                         |

| No. | CAS      | pLC <sub>50</sub> /mol L <sup>-1</sup> (exp.) | pLC <sub>50</sub> /mol L <sup>-1</sup> (SVM) |
|-----|----------|-----------------------------------------------|----------------------------------------------|
| 221 | 2869343  | 6.48                                          | 6.25                                         |
| 222 | 27304138 | 8.21                                          | 7.49                                         |
| 223 | 143226   | 2.04                                          | 2.05                                         |
| 224 | 56382    | 5.09                                          | 5.18                                         |
| 225 | 62737    | 4.8                                           | 4.66                                         |
| 226 | 104676   | 2.09                                          | 4.14                                         |
| 227 | 141275   | 4.32                                          | 4.50                                         |
| 228 | 41198087 | 6.65                                          | 6.11                                         |
| 229 | 512561   | 1.3                                           | 2.97                                         |
| 230 | 140885   | 4.6                                           | 3.62                                         |
| 231 | 5600215  | 3.01                                          | 2.96                                         |
| 232 | 68359375 | 8.6                                           | 7.78                                         |
| 233 | 583539   | 4.77                                          | 4.66                                         |
| 234 | 6921295  | 2.65                                          | 3.25                                         |
| 235 | 123159   | 3.73                                          | 3.47                                         |
| 236 | 109999   | 1.52                                          | 2.33                                         |
| 237 | 1634044  | 2.12                                          | 2.24                                         |
| 238 | 525826   | 4.8                                           | 4.86                                         |
| 239 | 90595    | 5.52                                          | 4.66                                         |
| 240 | 72548    | 4.86                                          | 6.27                                         |
| 241 | 2447792  | 3.3                                           | 3.60                                         |
| 242 | 124049   | 3.18                                          | 3.19                                         |
| 243 | 253521   | 3.12                                          | 3.05                                         |
| 244 | 18172673 | 5.43                                          | 5.35                                         |
| 245 | 3383968  | 7.14                                          | 7.12                                         |
| 246 | 70124775 | 9.35                                          | 7.90                                         |
| 247 | 14548459 | 4.11                                          | 4.33                                         |
| 248 | 1962750  | 5.67                                          | 5.68                                         |

| No. | CAS      | pLC <sub>50</sub> /mol L <sup>-1</sup> (exp.) | pLC <sub>50</sub> /mol L <sup>-1</sup> (SVM) |
|-----|----------|-----------------------------------------------|----------------------------------------------|
| 249 | 98434345 | 3.58                                          | 4.30                                         |
| 250 | 118796   | 4.7                                           | 5.00                                         |
| 251 | 57055386 | 5.41                                          | 6.50                                         |
| 252 | 16079882 | 1.23                                          | 3.42                                         |
| 253 | 732263   | 6.63                                          | 6.48                                         |
| 254 | 141935   | 4.51                                          | 4.97                                         |
| 255 | 622402   | 1.69                                          | 1.73                                         |
| 256 | 75978    | 3.06                                          | 2.63                                         |
| 257 | 693163   | 4.4                                           | 3.79                                         |
| 258 | 593088   | 5.74                                          | 5.75                                         |
| 259 | 100970   | 0.45                                          | 3.04                                         |
| 260 | 5989275  | 5.28                                          | 5.02                                         |
| 261 | 499832   | 2.72                                          | 3.51                                         |
| 262 | 584849   | 3.02                                          | 4.97                                         |
| 263 | 115866   | 5.57                                          | 5.58                                         |
| 264 | 34723825 | 2.94                                          | 3.00                                         |
| 265 | 623256   | 6.65                                          | 4.35                                         |
| 266 | 120218   | 3.87                                          | 4.25                                         |
| 267 | 1929824  | 4.37                                          | 4.96                                         |
| 268 | 95498    | 4.23                                          | 4.22                                         |
| 269 | 64675    | 3.21                                          | 3.65                                         |
| 270 | 3689245  | 6.26                                          | 5.48                                         |
| 271 | 2212671  | 3.84                                          | 4.01                                         |
| 272 | 75047    | 2.3                                           | 1.42                                         |
| 273 | 88722    | 3.57                                          | 3.83                                         |
| 274 | 105602   | 1.91                                          | 2.67                                         |
| 275 | 111251   | 4.68                                          | 4.41                                         |
| 276 | 206440   | 7.35                                          | 5.98                                         |

| No. | CAS      | pLC <sub>50</sub> /mol L <sup>-1</sup> (exp.) | pLC <sub>50</sub> /mol L <sup>-1</sup> (SVM) |
|-----|----------|-----------------------------------------------|----------------------------------------------|
| 277 | 111411   | 2.16                                          | 1.71                                         |
| 278 | 628762   | 3.75                                          | 3.74                                         |
| 279 | 112276   | 0.34                                          | 1.36                                         |
| 280 | 615656   | 3.6                                           | 3.57                                         |
| 281 | 620882   | 4.91                                          | 4.04                                         |
| 282 | 76222    | 3.14                                          | 3.39                                         |
| 283 | 92693    | 4.44                                          | 4.66                                         |
| 284 | 2499958  | 5.15                                          | 4.68                                         |
| 285 | 71410    | 2.27                                          | 2.70                                         |
| 286 | 2074671  | 3.64                                          | 3.21                                         |
| 287 | 102089   | 4.08                                          | 4.09                                         |
| 288 | 140669   | 6.43                                          | 5.94                                         |
| 289 | 111911   | 2.97                                          | 2.98                                         |
| 290 | 18292972 | 6.28                                          | 6.27                                         |
| 291 | 110065   | 5.12                                          | 4.72                                         |
| 292 | 2176627  | 5.73                                          | 5.72                                         |
| 293 | 693652   | 4.7                                           | 4.73                                         |
| 294 | 4839467  | 1.06                                          | 3.12                                         |
| 295 | 107197   | 4.56                                          | 3.07                                         |
| 296 | 37680652 | 6.88                                          | 5.94                                         |
| 297 | 79209    | 2.32                                          | 2.32                                         |
| 298 | 79061    | 2.6                                           | 3.03                                         |
| 299 | 836306   | 4.95                                          | 4.93                                         |
| 300 | 71556    | 3.45                                          | 3.44                                         |
| 301 | 768945   | 3.78                                          | 3.25                                         |
| 302 | 107108   | 2.28                                          | 2.07                                         |
| 303 | 106423   | 4.08                                          | 4.04                                         |
| 304 | 822866   | 3.92                                          | 4.01                                         |

| No. | CAS      | pLC <sub>50</sub> /mol L <sup>-1</sup> (exp.) | pLC <sub>50</sub> /mol L <sup>-1</sup> (SVM) |
|-----|----------|-----------------------------------------------|----------------------------------------------|
| 305 | 42087809 | 3.89                                          | 4.24                                         |
| 306 | 67685    | 0.36                                          | 2.36                                         |
| 307 | 589093   | 3.57                                          | 3.98                                         |
| 308 | 141435   | 1.47                                          | 1.77                                         |
| 309 | 97881    | 4.11                                          | 4.12                                         |
| 310 | 66332965 | 4.83                                          | 4.69                                         |
| 311 | 2016571  | 5.18                                          | 4.92                                         |
| 312 | 115322   | 5.79                                          | 6.46                                         |
| 313 | 496117   | 3.93                                          | 4.24                                         |
| 314 | 88697    | 4.21                                          | 3.93                                         |
| 315 | 108430   | 3.91                                          | 3.74                                         |
| 316 | 109217   | 4.1                                           | 4.05                                         |
| 317 | 120616   | 4.13                                          | 3.66                                         |
| 318 | 3066715  | 5.02                                          | 4.14                                         |
| 319 | 77714    | 0.89                                          | 2.52                                         |
| 320 | 64197    | 3.13                                          | 2.16                                         |
| 321 | 29553262 | 2.44                                          | 2.27                                         |
| 322 | 81196    | 5.38                                          | 5.56                                         |
| 323 | 78922    | 1.31                                          | 2.06                                         |
| 324 | 606202   | 3.99                                          | 4.44                                         |
| 325 | 102772   | 4.86                                          | 4.25                                         |
| 326 | 29091052 | 5.35                                          | 5.27                                         |
| 327 | 78900    | 1.87                                          | 1.86                                         |
| 328 | 120627   | 5.64                                          | 5.40                                         |
| 329 | 88302    | 4.36                                          | 4.11                                         |
| 330 | 709988   | 4.4                                           | 4.49                                         |
| 331 | 105533   | 4.04                                          | 3.38                                         |
| 332 | 27458942 | 4.4                                           | 4.18                                         |

| No. | CAS      | pLC <sub>50</sub> /mol L <sup>-1</sup> (exp.) | pLC <sub>50</sub> /mol L <sup>-1</sup> (SVM) |
|-----|----------|-----------------------------------------------|----------------------------------------------|
| 333 | 115902   | 3.85                                          | 4.47                                         |
| 334 | 30030252 | 5.69                                          | 4.50                                         |
| 335 | 127004   | 2.59                                          | 2.26                                         |
| 336 | 542756   | 5.67                                          | 3.71                                         |
| 337 | 957517   | 6.7                                           | 3.99                                         |
| 338 | 111773   | 1.32                                          | 1.36                                         |
| 339 | 95169    | 3.33                                          | 3.62                                         |
| 340 | 124174   | 3.42                                          | 3.23                                         |
| 341 | 112129   | 5.06                                          | 4.98                                         |
| 342 | 78966    | 1.47                                          | 1.61                                         |
| 343 | 85687    | 5.12                                          | 5.88                                         |
| 344 | 50317    | 4.42                                          | 4.51                                         |
| 345 | 2455245  | 3.69                                          | 3.55                                         |
| 346 | 937202   | 4.21                                          | 4.12                                         |
| 347 | 4170303  | 4.86                                          | 3.56                                         |
| 348 | 110623   | 3.83                                          | 3.31                                         |
| 349 | 1746232  | 5.52                                          | 5.51                                         |
| 350 | 58275    | 6.2                                           | 4.08                                         |
| 351 | 99036    | 2.55                                          | 3.18                                         |
| 352 | 62759    | 1.9                                           | 1.61                                         |
| 353 | 598787   | 2.93                                          | 2.65                                         |
| 354 | 78795    | 2.93                                          | 4.02                                         |
| 355 | 115208   | 2.7                                           | 3.32                                         |
| 356 | 1740198  | 5.16                                          | 6.97                                         |
| 357 | 514103   | 5.1                                           | 6.35                                         |
| 358 | 497370   | 2.69                                          | 2.83                                         |
| 359 | 95545    | 3.39                                          | 2.84                                         |
| 360 | 96059    | 5.11                                          | 4.12                                         |

| No. | CAS      | pLC <sub>50</sub> /mol L <sup>-1</sup> (exp.) | pLC <sub>50</sub> /mol L <sup>-1</sup> (SVM) |
|-----|----------|-----------------------------------------------|----------------------------------------------|
| 361 | 97029    | 4.08                                          | 4.16                                         |
| 362 | 944229   | 5.35                                          | 5.76                                         |
| 363 | 4916578  | 3.09                                          | 3.51                                         |
| 364 | 598743   | 2.49                                          | 2.35                                         |
| 365 | 94622    | 4.56                                          | 4.85                                         |
| 366 | 4460860  | 3.6                                           | 3.37                                         |
| 367 | 111706   | 3.53                                          | 3.48                                         |
| 368 | 110883   | 1.18                                          | 1.17                                         |
| 369 | 107120   | 1.56                                          | 2.77                                         |
| 370 | 818724   | 5.49                                          | 3.53                                         |
| 371 | 83329    | 4.95                                          | 4.94                                         |
| 372 | 2163793  | 3.84                                          | 3.81                                         |
| 373 | 109659   | 3.57                                          | 3.58                                         |
| 374 | 464459   | 3.39                                          | 3.83                                         |
| 375 | 96220    | 1.75                                          | 3.00                                         |
| 376 | 91236    | 2.9                                           | 3.56                                         |
| 377 | 924414   | 3.41                                          | 3.58                                         |
| 378 | 105759   | 5.56                                          | 4.99                                         |
| 379 | 330938   | 5.26                                          | 5.54                                         |
| 380 | 2051607  | 4.67                                          | 5.34                                         |
| 381 | 610413   | 4.33                                          | 4.34                                         |
| 382 | 91576    | 4.82                                          | 4.83                                         |
| 383 | 109977   | 2.5                                           | 3.04                                         |
| 384 | 22037974 | 4.38                                          | 4.55                                         |
| 385 | 6485558  | 2.47                                          | 2.03                                         |
| 386 | 67630    | 0.84                                          | 1.53                                         |
| 387 | 111717   | 3.98                                          | 3.90                                         |
| 388 | 55406536 | 6.15                                          | 4.20                                         |

| No. | CAS      | pLC <sub>50</sub> /mol L <sup>-1</sup> (exp.) | pLC <sub>50</sub> /mol L <sup>-1</sup> (SVM) |
|-----|----------|-----------------------------------------------|----------------------------------------------|
| 389 | 123728   | 3.69                                          | 2.93                                         |
| 390 | 538681   | 4.94                                          | 5.51                                         |
| 391 | 75070    | 3.12                                          | 2.40                                         |
| 392 | 813785   | 3.85                                          | 3.16                                         |
| 393 | 140318   | 1.77                                          | 2.02                                         |
| 394 | 23060142 | 3.77                                          | 3.45                                         |
| 395 | 1861401  | 6.53                                          | 6.06                                         |
| 396 | 142825   | 4.65                                          | 4.98                                         |
| 397 | 10453868 | 7.74                                          | 7.49                                         |
| 398 | 105146   | 2.67                                          | 3.35                                         |
| 399 | 111273   | 3.02                                          | 3.01                                         |
| 400 | 122032   | 4.35                                          | 4.16                                         |
| 401 | 4412913  | 2.29                                          | 3.21                                         |
| 402 | 124221   | 6.26                                          | 5.80                                         |
| 403 | 34274049 | 3.3                                           | 2.84                                         |
| 404 | 79958    | 5.44                                          | 6.37                                         |
| 405 | 7307553  | 5.91                                          | 5.39                                         |
| 406 | 98011    | 3.66                                          | 3.24                                         |
| 407 | 90028    | 4.73                                          | 3.56                                         |
| 408 | 87616    | 4.89                                          | 4.98                                         |
| 409 | 24544045 | 4.03                                          | 4.21                                         |
| 410 | 629049   | 5.09                                          | 4.86                                         |
| 411 | 18368633 | 2.74                                          | 3.35                                         |
| 412 | 15972608 | 4.73                                          | 4.32                                         |
| 413 | 315184   | 4.12                                          | 3.78                                         |
| 414 | 298022   | 6.02                                          | 5.33                                         |
| 415 | 121879   | 3.96                                          | 3.72                                         |
| 416 | 629403   | 2.41                                          | 3.05                                         |



| No. | CAS      | pLC <sub>50</sub> /mol L <sup>-1</sup> (exp.) | pLC <sub>50</sub> /mol L <sup>-1</sup> (SVM) |
|-----|----------|-----------------------------------------------|----------------------------------------------|
| 417 | 6175491  | 5.19                                          | 5.39                                         |
| 418 | 88040    | 4.66                                          | 4.33                                         |
| 419 | 110827   | 4.27                                          | 3.89                                         |
| 420 | 75898    | 2.93                                          | 2.08                                         |
| 421 | 2973764  | 3.59                                          | 3.61                                         |
| 422 | 2402791  | 5.34                                          | 5.00                                         |
| 423 | 706149   | 3.98                                          | 3.79                                         |
| 424 | 108861   | 3.93                                          | 4.08                                         |
| 425 | 62533    | 3.08                                          | 2.98                                         |
| 426 | 700389   | 3.51                                          | 3.75                                         |
| 427 | 607818   | 4.66                                          | 4.12                                         |
| 428 | 100618   | 3.03                                          | 3.26                                         |
| 429 | 1689845  | 4.34                                          | 4.31                                         |
| 430 | 818611   | 4.38                                          | 3.31                                         |
| 431 | 14816183 | 5.01                                          | 5.50                                         |
| 432 | 107200   | 4.37                                          | 3.16                                         |
| 433 | 128370   | 5.78                                          | 5.91                                         |
| 434 | 22104627 | 4.18                                          | 2.57                                         |
| 435 | 105544   | 2.82                                          | 3.31                                         |
| 436 | 87172    | 4.73                                          | 4.79                                         |
| 437 | 333415   | 4.51                                          | 4.52                                         |
| 438 | 121448   | 3.37                                          | 2.66                                         |
| 439 | 39515510 | 5.63                                          | 4.97                                         |
| 440 | 107186   | 5.26                                          | 3.15                                         |
| 441 | 65337135 | 3.78                                          | 2.65                                         |
| 442 | 10202923 | 4.26                                          | 4.44                                         |
| 443 | 111422   | 1.35                                          | 1.55                                         |
| 444 | 603838   | 3.48                                          | 3.53                                         |

| No. | CAS      | pLC <sub>50</sub> /mol L <sup>-1</sup> (exp.) | pLC <sub>50</sub> /mol L <sup>-1</sup> (SVM) |
|-----|----------|-----------------------------------------------|----------------------------------------------|
| 445 | 122145   | 4.81                                          | 5.21                                         |
| 446 | 109853   | 2.16                                          | 1.57                                         |
| 447 | 107459   | 3.72                                          | 3.49                                         |
| 448 | 72435    | 7.61                                          | 5.91                                         |
| 449 | 83794    | 7.85                                          | 5.93                                         |
| 450 | 96413    | 1.8                                           | 2.57                                         |
| 451 | 771608   | 3.69                                          | 3.48                                         |
| 452 | 4253898  | 4.26                                          | 4.28                                         |
| 453 | 109773   | 5.07                                          | 2.66                                         |
| 454 | 763699   | 3.29                                          | 2.98                                         |
| 455 | 50066    | 2.68                                          | 4.03                                         |
| 456 | 56348391 | 4.84                                          | 4.97                                         |
| 457 | 95318    | 5.9                                           | 4.77                                         |
| 458 | 2370630  | 3.76                                          | 3.57                                         |
| 459 | 96297    | 2.01                                          | 3.05                                         |
| 460 | 470826   | 3.18                                          | 3.41                                         |
| 461 | 22726007 | 3.33                                          | 3.53                                         |
| 462 | 592461   | 3.61                                          | 4.62                                         |
| 463 | 2921882  | 6.04                                          | 6.21                                         |
| 464 | 874420   | 4.99                                          | 4.36                                         |
| 465 | 62555    | 2.44                                          | 2.74                                         |
| 466 | 91656    | 3.86                                          | 3.87                                         |
| 467 | 86577    | 4.28                                          | 4.29                                         |
| 468 | 4901513  | 5.75                                          | 5.40                                         |
| 469 | 653372   | 5.25                                          | 3.79                                         |
| 470 | 608935   | 6.01                                          | 6.03                                         |
| 471 | 108805   | 3.79                                          | 3.07                                         |
| 472 | 1965099  | 4.54                                          | 4.40                                         |

| No. | CAS      | pLC <sub>50</sub> /mol L <sup>-1</sup> (exp.) | pLC <sub>50</sub> /mol L <sup>-1</sup> (SVM) |
|-----|----------|-----------------------------------------------|----------------------------------------------|
| 473 | 298044   | 4.97                                          | 5.60                                         |
| 474 | 16245797 | 6.23                                          | 5.79                                         |
| 475 | 693981   | 2.46                                          | 2.69                                         |
| 476 | 108883   | 3.43                                          | 3.75                                         |
| 477 | 119346   | 3.65                                          | 3.28                                         |
| 478 | 75058    | 1.4                                           | 2.40                                         |
| 479 | 89781    | 3.92                                          | 4.03                                         |
| 480 | 700583   | 3.39                                          | 3.49                                         |
| 481 | 528290   | 5.45                                          | 4.25                                         |
| 482 | 464482   | 3.95                                          | 3.18                                         |
|     | Test set |                                               |                                              |
| 483 | 107211   | 0.07                                          | 1.60                                         |
| 484 | 111466   | 0.15                                          | 1.49                                         |
| 485 | 57556    | 0.24                                          | 1.61                                         |
| 486 | 64175    | 0.5                                           | 1.18                                         |
| 487 | 110805   | 0.53                                          | 1.59                                         |
| 488 | 111900   | 0.71                                          | 1.45                                         |
| 489 | 100798   | 0.9                                           | 2.38                                         |
| 490 | 67641    | 0.91                                          | 2.18                                         |
| 491 | 123911   | 0.93                                          | 1.19                                         |
| 492 | 107415   | 1.04                                          | 2.06                                         |
| 493 | 75650    | 1.06                                          | 1.78                                         |
| 494 | 126818   | 1.09                                          | 3.00                                         |
| 495 | 71238    | 1.12                                          | 1.96                                         |
| 496 | 149315   | 1.13                                          | 2.40                                         |
| 497 | 383631   | 1.15                                          | 2.86                                         |
| 498 | 51796    | 1.23                                          | 2.26                                         |
| 499 | 103764   | 1.31                                          | 1.81                                         |

| No. | CAS      | pLC <sub>50</sub> /mol L <sup>-1</sup> (exp.) | pLC <sub>50</sub> /mol L <sup>-1</sup> (SVM) |
|-----|----------|-----------------------------------------------|----------------------------------------------|
| 500 | 78933    | 1.35                                          | 2.61                                         |
| 501 | 15892236 | 1.59                                          | 2.01                                         |
| 502 | 71363    | 1.63                                          | 2.21                                         |
| 503 | 109013   | 1.64                                          | 1.76                                         |
| 504 | 109079   | 1.65                                          | 1.92                                         |
| 505 | 78831    | 1.72                                          | 2.18                                         |
| 506 | 111693   | 1.75                                          | 2.74                                         |
| 507 | 110736   | 1.78                                          | 1.58                                         |
| 508 | 693936   | 1.78                                          | 2.59                                         |
| 509 | 109762   | 1.79                                          | 1.79                                         |
| 510 | 280579   | 1.81                                          | 2.08                                         |
| 511 | 100378   | 1.82                                          | 2.34                                         |
| 512 | 112072   | 1.82                                          | 3.34                                         |
| 513 | 107879   | 1.84                                          | 2.77                                         |
| 514 | 554121   | 1.89                                          | 2.85                                         |
| 515 | 685916   | 1.89                                          | 2.72                                         |
| 516 | 77758    | 1.91                                          | 2.76                                         |
| 517 | 95807    | 1.93                                          | 2.78                                         |
| 518 | 109897   | 1.93                                          | 1.85                                         |
| 519 | 563804   | 2                                             | 2.55                                         |
| 520 | 109068   | 2.02                                          | 2.86                                         |
| 521 | 94757    | 2.05                                          | 4.20                                         |
| 522 | 627305   | 2.07                                          | 2.38                                         |
| 523 | 105599   | 2.08                                          | 2.05                                         |
| 524 | 584021   | 2.11                                          | 2.50                                         |
| 525 | 108203   | 2.11                                          | 2.48                                         |
| 526 | 127060   | 2.12                                          | 2.65                                         |
| 527 | 55185    | 2.12                                          | 2.64                                         |

| No. | CAS      | pLC <sub>50</sub> /mol L <sup>-1</sup> (exp.) | pLC <sub>50</sub> /mol L <sup>-1</sup> (SVM) |
|-----|----------|-----------------------------------------------|----------------------------------------------|
| 528 | 17584122 | 2.12                                          | 2.50                                         |
| 529 | 621421   | 2.13                                          | 3.15                                         |
| 530 | 138863   | 2.15                                          | 5.00                                         |
| 531 | 108930   | 2.15                                          | 2.55                                         |
| 532 | 100709   | 2.16                                          | 2.98                                         |
| 533 | 77747    | 2.18                                          | 2.70                                         |
| 534 | 30899195 | 2.21                                          | 2.68                                         |
| 535 | 5813649  | 2.26                                          | 2.46                                         |
| 536 | 55210    | 2.26                                          | 3.13                                         |
| 537 | 103902   | 2.27                                          | 2.94                                         |
| 538 | 108214   | 2.28                                          | 2.67                                         |
| 539 | 75310    | 2.28                                          | 1.75                                         |
| 540 | 108101   | 2.28                                          | 2.88                                         |
| 541 | 6636788  | 2.32                                          | 3.26                                         |
| 542 | 105373   | 2.36                                          | 3.04                                         |
| 543 | 108894   | 2.36                                          | 2.86                                         |
| 544 | 591786   | 2.37                                          | 3.16                                         |
| 545 | 100516   | 2.37                                          | 3.16                                         |
| 546 | 120070   | 2.39                                          | 3.19                                         |
| 547 | 20662844 | 2.4                                           | 2.53                                         |
| 548 | 100710   | 2.41                                          | 3.22                                         |
| 549 | 928961   | 2.42                                          | 3.40                                         |
| 550 | 13952846 | 2.43                                          | 2.15                                         |
| 551 | 109739   | 2.44                                          | 2.29                                         |
| 552 | 141913   | 2.47                                          | 2.34                                         |
| 553 | 88686    | 2.54                                          | 2.96                                         |
| 554 | 540885   | 2.55                                          | 2.87                                         |
| 555 | 142621   | 2.56                                          | 3.45                                         |

| No. | CAS      | pLC <sub>50</sub> /mol L <sup>-1</sup> (exp.) | pLC <sub>50</sub> /mol L <sup>-1</sup> (SVM) |
|-----|----------|-----------------------------------------------|----------------------------------------------|
| 556 | 109751   | 2.57                                          | 3.15                                         |
| 557 | 928972   | 2.57                                          | 3.33                                         |
| 558 | 6602320  | 2.57                                          | 3.38                                         |
| 559 | 626937   | 2.57                                          | 2.80                                         |
| 560 | 623370   | 2.57                                          | 2.65                                         |
| 561 | 141786   | 2.58                                          | 2.56                                         |
| 562 | 80626    | 2.59                                          | 3.34                                         |
| 563 | 122996   | 2.6                                           | 3.33                                         |
| 564 | 110587   | 2.69                                          | 2.82                                         |
| 565 | 75990    | 2.69                                          | 3.10                                         |
| 566 | 126114   | 2.73                                          | 2.89                                         |
| 567 | 100641   | 2.74                                          | 3.04                                         |
| 568 | 1482151  | 2.74                                          | 2.67                                         |
| 569 | 110190   | 2.75                                          | 3.11                                         |
| 570 | 868779   | 2.76                                          | 3.10                                         |
| 571 | 78591    | 2.78                                          | 3.66                                         |
| 572 | 16879020 | 2.78                                          | 3.35                                         |
| 573 | 108996   | 2.81                                          | 2.86                                         |
| 574 | 106490   | 2.83                                          | 3.06                                         |
| 575 | 600362   | 2.85                                          | 3.00                                         |
| 576 | 110123   | 2.86                                          | 3.25                                         |
| 577 | 1122549  | 2.86                                          | 2.81                                         |
| 578 | 96800    | 2.86                                          | 2.66                                         |
| 579 | 107062   | 2.86                                          | 3.10                                         |
| 580 | 98862    | 2.87                                          | 3.37                                         |
| 581 | 123546   | 2.87                                          | 2.77                                         |
| 582 | 15045439 | 2.88                                          | 3.24                                         |
| 583 | 107299   | 2.89                                          | 2.82                                         |

| No. | CAS      | pLC <sub>50</sub> /mol L <sup>-1</sup> (exp.) | pLC <sub>50</sub> /mol L <sup>-1</sup> (SVM) |
|-----|----------|-----------------------------------------------|----------------------------------------------|
| 584 | 110861   | 2.9                                           | 2.80                                         |
| 585 | 932161   | 2.9                                           | 3.05                                         |
| 586 | 108656   | 2.91                                          | 2.50                                         |
| 587 | 15128822 | 2.92                                          | 3.34                                         |
| 588 | 123115   | 2.93                                          | 3.55                                         |
| 589 | 110430   | 2.94                                          | 3.47                                         |
| 590 | 2859678  | 2.96                                          | 2.74                                         |
| 591 | 51235042 | 2.96                                          | 3.67                                         |
| 592 | 769288   | 2.98                                          | 3.48                                         |
| 593 | 5683330  | 2.98                                          | 2.79                                         |
| 594 | 1072975  | 2.99                                          | 3.27                                         |
| 595 | 88755    | 3                                             | 3.63                                         |
| 596 | 142289   | 3.01                                          | 3.10                                         |
| 597 | 70699    | 3.01                                          | 3.41                                         |
| 598 | 98953    | 3.01                                          | 3.59                                         |
| 599 | 100469   | 3.02                                          | 3.06                                         |
| 600 | 108010   | 3.04                                          | 1.54                                         |
| 601 | 150765   | 3.05                                          | 3.30                                         |
| 602 | 110009   | 3.05                                          | 3.14                                         |
| 603 | 150787   | 3.07                                          | 3.49                                         |
| 604 | 123251   | 3.09                                          | 3.55                                         |
| 605 | 2439772  | 3.1                                           | 3.05                                         |
| 606 | 127662   | 3.11                                          | 3.40                                         |
| 607 | 95534    | 3.12                                          | 3.14                                         |
| 608 | 109524   | 3.12                                          | 3.19                                         |
| 609 | 65452    | 3.13                                          | 3.37                                         |
| 610 | 625865   | 3.14                                          | 3.43                                         |
| 611 | 464493   | 3.14                                          | 3.31                                         |

| No. | CAS      | pLC <sub>50</sub> /mol L <sup>-1</sup> (exp.) | pLC <sub>50</sub> /mol L <sup>-1</sup> (SVM) |
|-----|----------|-----------------------------------------------|----------------------------------------------|
| 612 | 496162   | 3.17                                          | 3.67                                         |
| 613 | 110930   | 3.17                                          | 3.65                                         |
| 614 | 104905   | 3.17                                          | 3.34                                         |
| 615 | 112050   | 3.18                                          | 4.58                                         |
| 616 | 110656   | 3.21                                          | 2.74                                         |
| 617 | 100470   | 3.21                                          | 3.41                                         |
| 618 | 578541   | 3.21                                          | 3.38                                         |
| 619 | 79005    | 3.21                                          | 3.45                                         |
| 620 | 91225    | 3.22                                          | 3.50                                         |
| 621 | 589162   | 3.22                                          | 3.35                                         |
| 622 | 150196   | 3.23                                          | 3.29                                         |
| 623 | 109604   | 3.23                                          | 2.98                                         |
| 624 | 100663   | 3.24                                          | 3.47                                         |
| 625 | 134623   | 3.24                                          | 3.69                                         |
| 626 | 108463   | 3.25                                          | 3.12                                         |
| 627 | 111262   | 3.25                                          | 3.13                                         |
| 628 | 14548460 | 3.25                                          | 3.80                                         |
| 629 | 121335   | 3.26                                          | 3.36                                         |
| 630 | 75365    | 3.27                                          | 2.59                                         |
| 631 | 121697   | 3.28                                          | 3.49                                         |
| 632 | 121324   | 3.28                                          | 3.55                                         |
| 633 | 108394   | 3.29                                          | 3.40                                         |
| 634 | 927742   | 3.29                                          | 2.82                                         |
| 635 | 75912    | 3.33                                          | 1.76                                         |
| 636 | 99558    | 3.35                                          | 3.37                                         |
| 637 | 529204   | 3.36                                          | 3.59                                         |
| 638 | 945517   | 3.37                                          | 3.89                                         |
| 639 | 14321278 | 3.37                                          | 3.42                                         |



| No. | CAS      | pLC <sub>50</sub> /mol L <sup>-1</sup> (exp.) | pLC <sub>50</sub> /mol L <sup>-1</sup> (SVM) |
|-----|----------|-----------------------------------------------|----------------------------------------------|
| 640 | 552410   | 3.38                                          | 3.66                                         |
| 641 | 2117115  | 3.38                                          | 2.39                                         |
| 642 | 131113   | 3.39                                          | 3.62                                         |
| 643 | 619249   | 3.39                                          | 3.35                                         |
| 644 | 110565   | 3.39                                          | 3.50                                         |
| 645 | 96184    | 3.41                                          | 3.69                                         |
| 646 | 80524    | 3.42                                          | 2.80                                         |
| 647 | 529191   | 3.42                                          | 3.71                                         |
| 648 | 57432    | 3.42                                          | 3.89                                         |
| 649 | 102692   | 3.42                                          | 3.16                                         |
| 650 | 102272   | 3.44                                          | 3.78                                         |
| 651 | 587020   | 3.44                                          | 3.45                                         |
| 652 | 99990    | 3.44                                          | 3.78                                         |
| 653 | 99978    | 3.44                                          | 3.73                                         |
| 654 | 19549985 | 3.46                                          | 3.40                                         |
| 655 | 108952   | 3.46                                          | 3.25                                         |
| 656 | 88744    | 3.46                                          | 3.55                                         |
| 657 | 621089   | 3.46                                          | 3.90                                         |
| 658 | 107131   | 3.47                                          | 3.50                                         |
| 659 | 108441   | 3.47                                          | 3.12                                         |
| 660 | 506967   | 3.48                                          | 2.76                                         |
| 661 | 68111    | 3.49                                          | 2.84                                         |
| 662 | 100107   | 3.51                                          | 3.51                                         |
| 663 | 459596   | 3.51                                          | 3.52                                         |
| 664 | 108054   | 3.52                                          | 3.28                                         |
| 665 | 4798441  | 3.52                                          | 3.23                                         |
| 666 | 4920778  | 3.52                                          | 3.87                                         |
| 667 | 10293068 | 3.53                                          | 3.49                                         |

| No. | CAS      | pLC <sub>50</sub> /mol L <sup>-1</sup> (exp.) | pLC <sub>50</sub> /mol L <sup>-1</sup> (SVM) |
|-----|----------|-----------------------------------------------|----------------------------------------------|
| 668 | 91883    | 3.53                                          | 3.91                                         |
| 669 | 1129357  | 3.54                                          | 3.45                                         |
| 670 | 56235    | 3.55                                          | 3.91                                         |
| 671 | 111137   | 3.55                                          | 3.82                                         |
| 672 | 103833   | 3.55                                          | 3.38                                         |
| 673 | 368774   | 3.56                                          | 3.83                                         |
| 674 | 504609   | 3.56                                          | 4.27                                         |
| 675 | 106401   | 3.56                                          | 3.58                                         |
| 676 | 104870   | 3.56                                          | 3.57                                         |
| 677 | 71862027 | 3.56                                          | 3.66                                         |
| 678 | 2150472  | 3.57                                          | 3.59                                         |
| 679 | 2759286  | 3.57                                          | 3.47                                         |
| 680 | 100027   | 3.57                                          | 3.60                                         |
| 681 | 2362610  | 3.6                                           | 4.09                                         |
| 682 | 447609   | 3.61                                          | 3.93                                         |
| 683 | 106478   | 3.61                                          | 3.46                                         |
| 684 | 98884    | 3.61                                          | 3.37                                         |
| 685 | 123057   | 3.63                                          | 4.18                                         |
| 686 | 99081    | 3.63                                          | 3.77                                         |
| 687 | 107982   | 3.64                                          | 1.45                                         |
| 688 | 71432    | 3.65                                          | 3.52                                         |
| 689 | 576261   | 3.66                                          | 3.58                                         |
| 690 | 33693048 | 3.66                                          | 4.12                                         |
| 691 | 502567   | 3.66                                          | 4.24                                         |
| 692 | 104767   | 3.66                                          | 3.78                                         |
| 693 | 94097    | 3.67                                          | 3.51                                         |
| 694 | 573568   | 3.67                                          | 4.34                                         |
| 695 | 150685   | 3.68                                          | 3.54                                         |

| No. | CAS      | pLC <sub>50</sub> /mol L <sup>-1</sup> (exp.) | pLC <sub>50</sub> /mol L <sup>-1</sup> (SVM) |
|-----|----------|-----------------------------------------------|----------------------------------------------|
| 696 | 107755   | 3.7                                           | 3.15                                         |
| 697 | 350469   | 3.7                                           | 3.62                                         |
| 698 | 107471   | 3.7                                           | 3.99                                         |
| 699 | 2164172  | 3.71                                          | 3.89                                         |
| 700 | 111682   | 3.72                                          | 3.57                                         |
| 701 | 88733    | 3.73                                          | 3.97                                         |
| 702 | 5922601  | 3.73                                          | 3.52                                         |
| 703 | 10031820 | 3.73                                          | 3.79                                         |
| 704 | 56108124 | 3.75                                          | 3.79                                         |
| 705 | 614802   | 3.75                                          | 3.24                                         |
| 706 | 121142   | 3.75                                          | 4.31                                         |
| 707 | 95523    | 3.75                                          | 3.91                                         |
| 708 | 66251    | 3.76                                          | 3.51                                         |
| 709 | 98168    | 3.77                                          | 3.51                                         |
| 710 | 119324   | 3.77                                          | 3.49                                         |
| 711 | 10151    | 3.77                                          | 3.78                                         |
| 712 | 31502575 | 3.77                                          | 3.99                                         |
| 713 | 2028639  | 3.78                                          | 2.64                                         |
| 714 | 619727   | 3.78                                          | 3.34                                         |
| 715 | 393395   | 3.78                                          | 3.81                                         |
| 716 | 89623    | 3.79                                          | 3.70                                         |
| 717 | 100005   | 3.8                                           | 4.02                                         |
| 718 | 570241   | 3.8                                           | 3.71                                         |
| 719 | 578461   | 3.8                                           | 3.83                                         |
| 720 | 123864   | 3.81                                          | 3.29                                         |
| 721 | 95476    | 3.81                                          | 4.06                                         |
| 722 | 607001   | 3.81                                          | 4.55                                         |
| 723 | 500221   | 3.82                                          | 3.01                                         |

| No. | CAS     | pLC <sub>50</sub> /mol L <sup>-1</sup> (exp.) | pLC <sub>50</sub> /mol L <sup>-1</sup> (SVM) |
|-----|---------|-----------------------------------------------|----------------------------------------------|
| 724 | 106445  | 3.82                                          | 3.40                                         |
| 725 | 371404  | 3.82                                          | 3.17                                         |
| 726 | 108383  | 3.82                                          | 4.03                                         |
| 727 | 108907  | 3.82                                          | 3.93                                         |
| 728 | 3302101 | 3.83                                          | 4.11                                         |
| 729 | 97530   | 3.84                                          | 3.94                                         |
| 730 | 108418  | 3.84                                          | 4.22                                         |
| 731 | 554847  | 3.84                                          | 3.59                                         |
| 732 | 106230  | 3.84                                          | 4.48                                         |
| 733 | 84662   | 3.84                                          | 4.00                                         |
| 734 | 764012  | 3.84                                          | 2.73                                         |
| 735 | 1119400 | 3.85                                          | 3.31                                         |
| 736 | 616864  | 3.85                                          | 3.83                                         |
| 737 | 3944761 | 3.85                                          | 3.69                                         |
| 738 | 105679  | 3.87                                          | 3.60                                         |
| 739 | 5673074 | 3.88                                          | 3.66                                         |
| 740 | 95487   | 3.89                                          | 3.47                                         |
| 741 | 1891958 | 3.89                                          | 4.00                                         |
| 742 | 619501  | 3.89                                          | 3.80                                         |
| 743 | 108598  | 3.9                                           | 3.04                                         |
| 744 | 95658   | 3.9                                           | 3.59                                         |
| 745 | 618859  | 3.91                                          | 4.21                                         |
| 746 | 118616  | 3.92                                          | 4.11                                         |
| 747 | 613456  | 3.92                                          | 3.52                                         |
| 748 | 2216515 | 3.92                                          | 3.93                                         |
| 749 | 99525   | 3.92                                          | 3.37                                         |
| 750 | 5464711 | 3.93                                          | 4.55                                         |
| 751 | 271896  | 3.93                                          | 4.04                                         |

| No. | CAS      | pLC <sub>50</sub> /mol L <sup>-1</sup> (exp.) | pLC <sub>50</sub> /mol L <sup>-1</sup> (SVM) |
|-----|----------|-----------------------------------------------|----------------------------------------------|
| 752 | 96173    | 3.94                                          | 3.25                                         |
| 753 | 111308   | 3.94                                          | 3.25                                         |
| 754 | 1745819  | 3.95                                          | 3.97                                         |
| 755 | 91667    | 3.96                                          | 4.39                                         |
| 756 | 821556   | 3.97                                          | 4.16                                         |
| 757 | 498668   | 3.97                                          | 3.90                                         |
| 758 | 108429   | 3.98                                          | 3.43                                         |
| 759 | 111875   | 3.98                                          | 3.88                                         |
| 760 | 939231   | 3.98                                          | 4.02                                         |
| 761 | 6575093  | 4                                             | 4.05                                         |
| 762 | 100414   | 4.01                                          | 4.19                                         |
| 763 | 527606   | 4.02                                          | 3.91                                         |
| 764 | 552896   | 4.02                                          | 3.84                                         |
| 765 | 95012    | 4.02                                          | 3.43                                         |
| 766 | 100527   | 4.03                                          | 3.43                                         |
| 767 | 141286   | 4.05                                          | 3.72                                         |
| 768 | 95578    | 4.05                                          | 3.59                                         |
| 769 | 123079   | 4.07                                          | 3.74                                         |
| 770 | 120809   | 4.08                                          | 3.19                                         |
| 771 | 119619   | 4.09                                          | 4.56                                         |
| 772 | 645567   | 4.09                                          | 4.10                                         |
| 773 | 35572782 | 4.12                                          | 4.11                                         |
| 774 | 99887    | 4.13                                          | 3.58                                         |
| 775 | 83410    | 4.14                                          | 4.01                                         |
| 776 | 93890    | 4.14                                          | 3.91                                         |
| 777 | 94826    | 4.14                                          | 4.62                                         |
| 778 | 275514   | 4.15                                          | 4.40                                         |
| 779 | 104132   | 4.17                                          | 4.01                                         |

| No. | CAS      | pLC <sub>50</sub> /mol L <sup>-1</sup> (exp.) | pLC <sub>50</sub> /mol L <sup>-1</sup> (SVM) |
|-----|----------|-----------------------------------------------|----------------------------------------------|
| 780 | 2905693  | 4.17                                          | 4.31                                         |
| 781 | 83341    | 4.17                                          | 3.96                                         |
| 782 | 555168   | 4.18                                          | 3.75                                         |
| 783 | 6393426  | 4.18                                          | 4.31                                         |
| 784 | 760236   | 4.18                                          | 3.83                                         |
| 785 | 149304   | 4.19                                          | 4.24                                         |
| 786 | 95501    | 4.19                                          | 4.45                                         |
| 787 | 1126461  | 4.19                                          | 4.07                                         |
| 788 | 90120    | 4.2                                           | 4.86                                         |
| 789 | 2234164  | 4.21                                          | 4.23                                         |
| 790 | 70343065 | 4.21                                          | 4.41                                         |
| 791 | 123660   | 4.21                                          | 4.04                                         |
| 792 | 2416946  | 4.22                                          | 3.89                                         |
| 793 | 387451   | 4.23                                          | 3.90                                         |
| 794 | 583788   | 4.23                                          | 4.14                                         |
| 795 | 80433    | 4.24                                          | 6.34                                         |
| 796 | 56348404 | 4.25                                          | 4.38                                         |
| 797 | 94815    | 4.26                                          | 4.50                                         |
| 798 | 541731   | 4.26                                          | 4.48                                         |
| 799 | 3923522  | 4.27                                          | 4.29                                         |
| 800 | 59507    | 4.29                                          | 4.01                                         |
| 801 | 122349   | 4.31                                          | 3.68                                         |
| 802 | 91203    | 4.32                                          | 4.44                                         |
| 803 | 585342   | 4.32                                          | 4.19                                         |
| 804 | 106489   | 4.32                                          | 3.78                                         |
| 805 | 2626837  | 4.32                                          | 4.16                                         |
| 806 | 120832   | 4.32                                          | 4.14                                         |
| 807 | 95761    | 4.33                                          | 3.93                                         |

| No. | CAS      | pLC <sub>50</sub> /mol L <sup>-1</sup> (exp.) | pLC <sub>50</sub> /mol L <sup>-1</sup> (SVM) |
|-----|----------|-----------------------------------------------|----------------------------------------------|
| 808 | 106434   | 4.33                                          | 4.27                                         |
| 809 | 1484260  | 4.34                                          | 4.12                                         |
| 810 | 95512    | 4.35                                          | 3.43                                         |
| 811 | 108872   | 4.36                                          | 4.40                                         |
| 812 | 5372816  | 4.37                                          | 3.91                                         |
| 813 | 121755   | 4.37                                          | 5.21                                         |
| 814 | 114261   | 4.38                                          | 3.52                                         |
| 815 | 834128   | 4.38                                          | 4.22                                         |
| 816 | 99650    | 4.38                                          | 4.21                                         |
| 817 | 2051618  | 4.38                                          | 5.54                                         |
| 818 | 111864   | 4.4                                           | 3.97                                         |
| 819 | 100447   | 4.4                                           | 3.87                                         |
| 820 | 3452979  | 4.4                                           | 3.81                                         |
| 821 | 143088   | 4.4                                           | 4.37                                         |
| 822 | 100425   | 4.41                                          | 4.19                                         |
| 823 | 554007   | 4.41                                          | 3.98                                         |
| 824 | 99616    | 4.42                                          | 3.76                                         |
| 825 | 1126790  | 4.42                                          | 4.59                                         |
| 826 | 872311   | 4.42                                          | 4.04                                         |
| 827 | 1194656  | 4.42                                          | 4.14                                         |
| 828 | 590863   | 4.42                                          | 2.98                                         |
| 829 | 2243278  | 4.42                                          | 4.41                                         |
| 830 | 63252    | 4.45                                          | 4.00                                         |
| 831 | 90437    | 4.45                                          | 4.41                                         |
| 832 | 19406510 | 4.46                                          | 4.24                                         |
| 833 | 103651   | 4.46                                          | 4.59                                         |
| 834 | 98544    | 4.47                                          | 4.22                                         |
| 835 | 54576328 | 4.47                                          | 4.37                                         |

| No. | CAS      | pLC <sub>50</sub> /mol L <sup>-1</sup> (exp.) | pLC <sub>50</sub> /mol L <sup>-1</sup> (SVM) |
|-----|----------|-----------------------------------------------|----------------------------------------------|
| 836 | 1638228  | 4.47                                          | 4.49                                         |
| 837 | 298000   | 4.47                                          | 4.93                                         |
| 838 | 6203185  | 4.47                                          | 3.86                                         |
| 839 | 90153    | 4.49                                          | 3.98                                         |
| 840 | 88062    | 4.5                                           | 4.64                                         |
| 841 | 693549   | 4.51                                          | 4.58                                         |
| 842 | 142927   | 4.52                                          | 4.02                                         |
| 843 | 51218452 | 4.54                                          | 4.25                                         |
| 844 | 95738    | 4.54                                          | 4.76                                         |
| 845 | 1570656  | 4.54                                          | 4.40                                         |
| 846 | 6358641  | 4.54                                          | 3.42                                         |
| 847 | 17754904 | 4.56                                          | 4.38                                         |
| 848 | 5465656  | 4.56                                          | 4.29                                         |
| 849 | 5292455  | 4.56                                          | 4.26                                         |
| 850 | 831823   | 4.58                                          | 4.73                                         |
| 851 | 106241   | 4.59                                          | 4.36                                         |
| 852 | 104552   | 4.59                                          | 3.96                                         |
| 853 | 634935   | 4.59                                          | 4.67                                         |
| 854 | 999611   | 4.59                                          | 3.12                                         |
| 855 | 544401   | 4.61                                          | 4.72                                         |
| 856 | 106467   | 4.62                                          | 4.52                                         |
| 857 | 135193   | 4.62                                          | 3.95                                         |
| 858 | 94677    | 4.63                                          | 3.41                                         |
| 859 | 101848   | 4.63                                          | 5.33                                         |
| 860 | 67367    | 4.63                                          | 4.90                                         |
| 861 | 2460493  | 4.64                                          | 4.14                                         |
| 862 | 99865    | 4.64                                          | 5.12                                         |
| 863 | 1912249  | 4.64                                          | 3.80                                         |



| No. | CAS      | pLC <sub>50</sub> /mol L <sup>-1</sup> (exp.) | pLC <sub>50</sub> /mol L <sup>-1</sup> (SVM) |
|-----|----------|-----------------------------------------------|----------------------------------------------|
| 864 | 122394   | 4.65                                          | 4.69                                         |
| 865 | 89838    | 4.67                                          | 4.18                                         |
| 866 | 6361213  | 4.68                                          | 4.35                                         |
| 867 | 133119   | 4.68                                          | 4.45                                         |
| 868 | 80057    | 4.69                                          | 4.79                                         |
| 869 | 102067   | 4.7                                           | 3.92                                         |
| 870 | 84833    | 4.71                                          | 4.33                                         |
| 871 | 141037   | 4.71                                          | 4.72                                         |
| 872 | 634673   | 4.73                                          | 4.58                                         |
| 873 | 108703   | 4.74                                          | 5.09                                         |
| 874 | 329715   | 4.74                                          | 4.25                                         |
| 875 | 95750    | 4.74                                          | 4.72                                         |
| 876 | 89985    | 4.75                                          | 3.84                                         |
| 877 | 107142   | 4.75                                          | 3.13                                         |
| 878 | 108361   | 4.78                                          | 4.73                                         |
| 879 | 120821   | 4.78                                          | 5.03                                         |
| 880 | 106638   | 4.79                                          | 3.91                                         |
| 881 | 148538   | 4.8                                           | 3.46                                         |
| 882 | 7383199  | 4.8                                           | 3.28                                         |
| 883 | 80466    | 4.8                                           | 4.67                                         |
| 884 | 39905572 | 4.81                                          | 4.67                                         |
| 885 | 112301   | 4.82                                          | 4.81                                         |
| 886 | 112209   | 4.82                                          | 4.46                                         |
| 887 | 104518   | 4.83                                          | 5.05                                         |
| 888 | 708769   | 4.83                                          | 3.60                                         |
| 889 | 105997   | 4.85                                          | 4.90                                         |
| 890 | 616739   | 4.86                                          | 4.47                                         |
| 891 | 95954    | 4.86                                          | 4.72                                         |

| No. | CAS      | pLC <sub>50</sub> /mol L <sup>-1</sup> (exp.) | pLC <sub>50</sub> /mol L <sup>-1</sup> (SVM) |
|-----|----------|-----------------------------------------------|----------------------------------------------|
| 892 | 118967   | 4.88                                          | 6.01                                         |
| 893 | 260946   | 4.89                                          | 4.58                                         |
| 894 | 92524    | 4.9                                           | 5.09                                         |
| 895 | 5267276  | 4.91                                          | 4.43                                         |
| 896 | 61096842 | 4.95                                          | 5.18                                         |
| 897 | 935955   | 4.95                                          | 5.32                                         |
| 898 | 2138229  | 4.96                                          | 3.51                                         |
| 899 | 446526   | 4.96                                          | 3.54                                         |
| 900 | 110407   | 4.98                                          | 4.89                                         |
| 901 | 95829    | 4.99                                          | 4.00                                         |
| 902 | 109648   | 4.99                                          | 3.54                                         |
| 903 | 636306   | 5                                             | 4.60                                         |
| 904 | 602017   | 5.01                                          | 4.31                                         |
| 905 | 13608872 | 5.05                                          | 4.77                                         |
| 906 | 534521   | 5.05                                          | 4.26                                         |
| 907 | 610399   | 5.08                                          | 4.26                                         |
| 908 | 91941    | 5.11                                          | 4.72                                         |
| 909 | 619158   | 5.15                                          | 4.25                                         |
| 910 | 4117140  | 5.16                                          | 4.48                                         |
| 911 | 93914    | 5.17                                          | 3.53                                         |
| 912 | 14938353 | 5.18                                          | 4.98                                         |
| 913 | 1761611  | 5.19                                          | 4.18                                         |
| 914 | 112425   | 5.22                                          | 5.28                                         |
| 915 | 118558   | 5.26                                          | 5.13                                         |
| 916 | 80068    | 5.26                                          | 5.16                                         |
| 917 | 6846500  | 5.27                                          | 5.04                                         |
| 918 | 112538   | 5.27                                          | 5.71                                         |
| 919 | 454897   | 5.28                                          | 3.87                                         |

| No. | CAS      | pLC <sub>50</sub> /mol L <sup>-1</sup> (exp.) | pLC <sub>50</sub> /mol L <sup>-1</sup> (SVM) |
|-----|----------|-----------------------------------------------|----------------------------------------------|
| 920 | 2536314  | 5.28                                          | 4.48                                         |
| 921 | 106376   | 5.28                                          | 4.77                                         |
| 922 | 634662   | 5.29                                          | 5.54                                         |
| 923 | 1198556  | 5.29                                          | 5.17                                         |
| 924 | 99354    | 5.29                                          | 5.97                                         |
| 925 | 86748    | 5.29                                          | 4.76                                         |
| 926 | 3428248  | 5.3                                           | 3.96                                         |
| 927 | 471772   | 5.31                                          | 6.32                                         |
| 928 | 635938   | 5.31                                          | 4.07                                         |
| 929 | 56207397 | 5.34                                          | 4.42                                         |
| 930 | 116063   | 5.34                                          | 3.66                                         |
| 931 | 58902    | 5.35                                          | 5.32                                         |
| 932 | 22936863 | 5.38                                          | 3.94                                         |
| 933 | 10222012 | 5.39                                          | 3.43                                         |
| 934 | 100254   | 5.39                                          | 4.17                                         |
| 935 | 634902   | 5.39                                          | 5.56                                         |
| 936 | 1563662  | 5.42                                          | 3.87                                         |
| 937 | 29590429 | 5.44                                          | 5.19                                         |
| 938 | 84742    | 5.45                                          | 5.57                                         |
| 939 | 111319   | 5.47                                          | 4.09                                         |
| 940 | 3126907  | 5.49                                          | 5.77                                         |
| 941 | 88857    | 5.54                                          | 4.98                                         |
| 942 | 2437254  | 5.63                                          | 5.69                                         |
| 943 | 1825214  | 5.63                                          | 6.12                                         |
| 944 | 4097498  | 5.65                                          | 4.91                                         |
| 945 | 23184669 | 5.65                                          | 5.40                                         |
| 946 | 55792615 | 5.77                                          | 5.43                                         |
| 947 | 1871574  | 5.82                                          | 3.77                                         |

| No. | CAS      | pLC <sub>50</sub> /mol L <sup>-1</sup> (exp.) | pLC <sub>50</sub> /mol L <sup>-1</sup> (SVM) |
|-----|----------|-----------------------------------------------|----------------------------------------------|
| 948 | 95943    | 5.83                                          | 5.54                                         |
| 949 | 97234    | 5.94                                          | 5.54                                         |
| 950 | 299843   | 6.02                                          | 6.05                                         |
| 951 | 87865    | 6.04                                          | 6.02                                         |
| 952 | 3558698  | 6.04                                          | 5.99                                         |
| 953 | 123319   | 6.4                                           | 3.15                                         |
| 954 | 87683    | 6.46                                          | 6.25                                         |
| 955 | 1582098  | 6.5                                           | 5.98                                         |
| 956 | 58899    | 6.52                                          | 5.79                                         |
| 957 | 57749    | 6.55                                          | 6.95                                         |
| 958 | 37529309 | 6.58                                          | 6.64                                         |
| 959 | 1204213  | 6.59                                          | 3.74                                         |
| 960 | 3698837  | 6.77                                          | 5.64                                         |
| 961 | 13071799 | 7.34                                          | 5.64                                         |
| 962 | 120127   | 7.47                                          | 5.58                                         |
| 963 | 1484135  | 7.78                                          | 5.58                                         |

**Table S2**

Definitions of molecular descriptors selected.

| Descriptor | Definition                                                                                             |
|------------|--------------------------------------------------------------------------------------------------------|
| CLOGP      | Octanol–water partition coefficient from CLogP Driver (molecular properties)                           |
| SM6_B(P)   | Spectral moment of order 6 from Burden matrix weighted by polarizability (2D matrix-based descriptors) |
| NDB        | Number of double bonds (constitutional indices)                                                        |
| nHM        | Number of heavy atoms (constitutional indices)                                                         |
| SPMAD_EA   | Spectral mean absolute deviation from edge adjacency mat. (Edge adjacency indices)                     |
| MOR10E     | Signal 10/weighted by Sanderson electronegativity (3D-MoRSE descriptors)                               |
| B10[C-N]   | Presence/absence of C - N at topological distance 10 (2D atom pairs)                                   |
| MLOGP      | Moriguchi octanol-water partition coefficient (molecular properties)                                   |

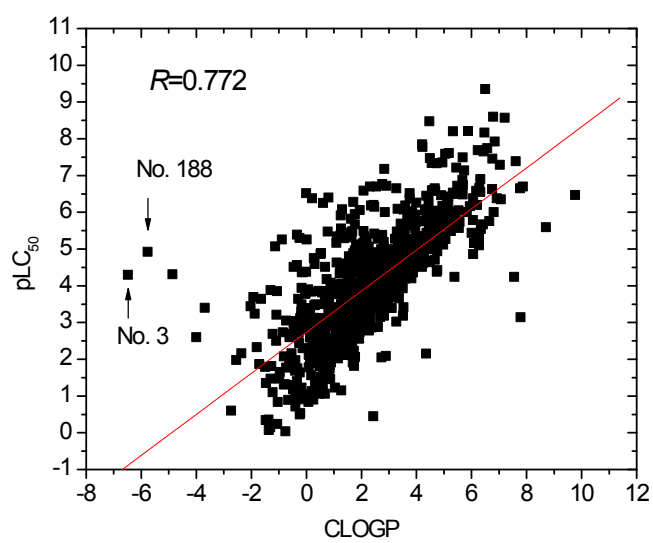

**Fig. S1.** Plot of the descriptor CLOGP versus pLC<sub>50</sub>

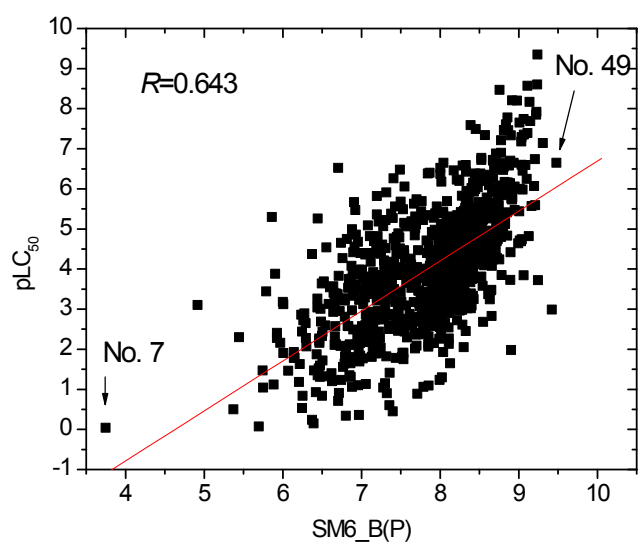

**Fig. S2.** Plot of the descriptor SM6\_B(P) versus pLC<sub>50</sub>

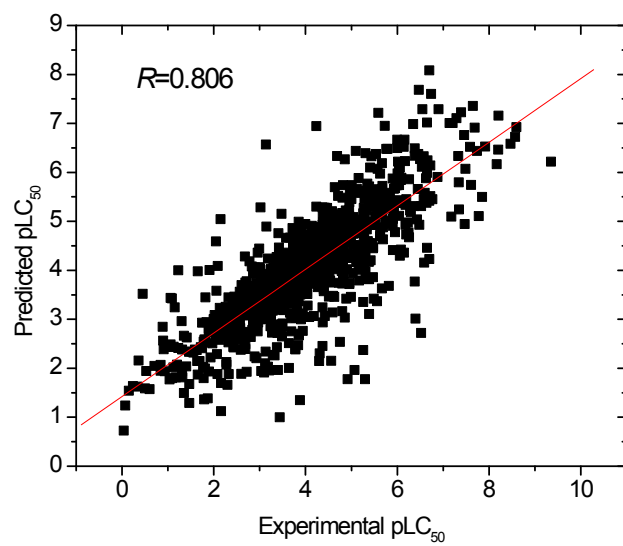

**Fig.S3.** Plot of experimental versus predicted  $pEC_{10}$  with Eq. (12).
